# Supplementary material for: Normalisation against Circadian and Age-Related Disturbances Enables Robust Detection of Gene Expression Changes in Liver of Aged Mice
Source: PubMed Central journal article supplement (PMC5222604; doi:10.1371/journal.pone.0169615), 2017-01-09
Supplement: pone.0169615.s007.pdf [file pone.0169615.s007.pdf]

## Real-time PCR probes for mRNA determination

FAM: 6-fluorescein; YY: Yakima yellow; BHQ1: Black hole quencher type 1

### Genes for normalization:

#### *Atp5h*

FW: TGC CCT GAA GAT TCC TGT GCC T

RV: ACT CAG CAC AGC TCT TCA CAT CCT

TM: YY-TCT CCT CCT GGT CCA CCA GGG CTG TGT-BHQ1

#### *Gsk3 $\beta$*

FW: CCA CCT CCT TTG CGG AGA GC

RV: CTG TGG TTA CCT TGC TGC CAT CT

TM: YY-TGC AAG CCA GTG CAG CAG CCT TCA GCT-BHQ1

#### *Sirt2*

FW: CAG GCC AGA CGG ACC CCT TC

RV: AGG CCA CGT CCC TGT AAG CC

TM: FAM-TGA TGG GCC TGG GAG GTG GCA TGG A-BHQ1

### Circadian genes:

#### *Csnk1 $\delta$*

FW: GGA ACG AGA ACG GAA AGT GAG TAT GC

RV: TGT CGG CCC GTG AGA TCA GA

TM: FAM-CAC CGT GGG GCC CCA GTC AAC GT-BHQ1

#### *Csnk1 $\epsilon$*

FW: CGC CAA TCG AGG TCC TCT GCA A

RV: CGG AAG AGC TGG CGC AGG TA

TM: FAM-ACT TCT GCC GCT CCC TGC GGT TCG A-BHQ1

#### *Glut2*

FW: TTC CTT CCA GTT CGG CTA TG

RV: GAA CAC CCA AAA CAT GTC GAT

TM: FAM-CAT CGG TGT GAT CAA TGC ACC TCA-BHQ1

#### *Sfpq*

FW: ATA CGG AGA ACC CGG AGA AG

RV: CTC AGC TTT GGC GAT TTC AG

TM: FAM-TGA ACC CGA ACC CTT TGC CTT TG-BHQ1
